# Supplementary material for: Early life adversity shapes social subordination and cell type–specific transcriptomic patterning in the ventral hippocampus
Source: PubMed Central journal article supplement (PMC10691768; doi:10.1126/sciadv.adj3793), 2023-12-01
Supplement: sciadv.adj3793_sm.pdf [file sciadv.adj3793_sm.pdf]

## Supplementary Materials for

### Early life adversity shapes social subordination and cell type–specific transcriptomic patterning in the ventral hippocampus

Aron Kos *et al.*

Corresponding author: Alon Chen, [alon.chen@weizmann.ac.il](mailto:alon.chen@weizmann.ac.il); Juan Pablo Lopez, [jpablo.lopez@ki.se](mailto:jpablo.lopez@ki.se)

*Sci. Adv.* **9**, eadj3793 (2023)  
DOI: 10.1126/sciadv.adj3793

#### **This PDF file includes:**

Figs. S1 to S12  
Table S1

**A**

Juvenile ♂

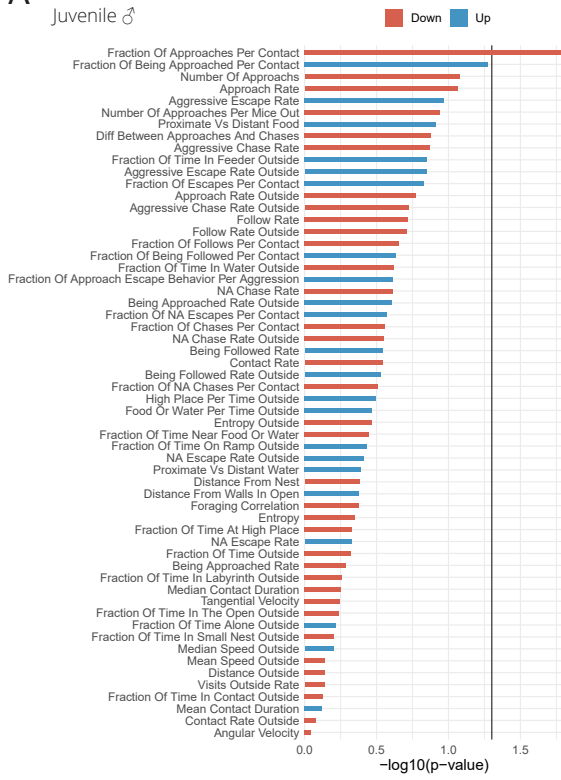

**B**

Adult ♂

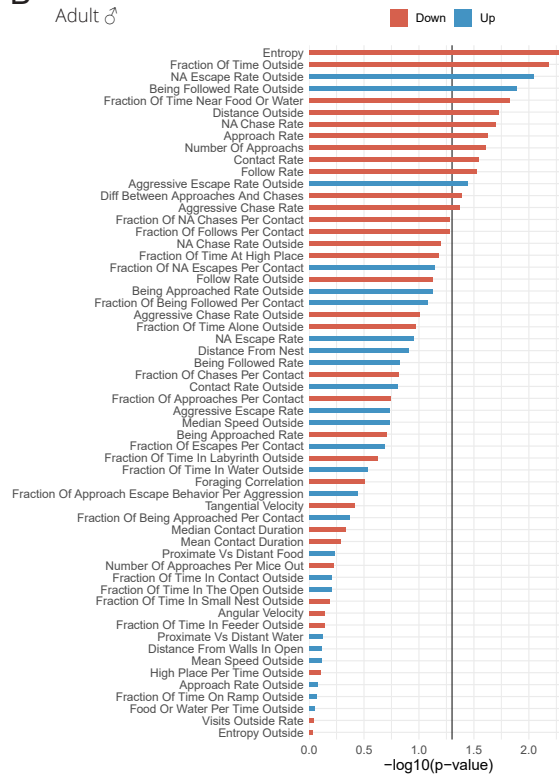

**C**

Juvenile ♂

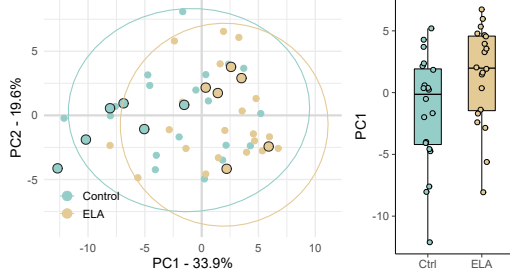

**D**

Adult ♂

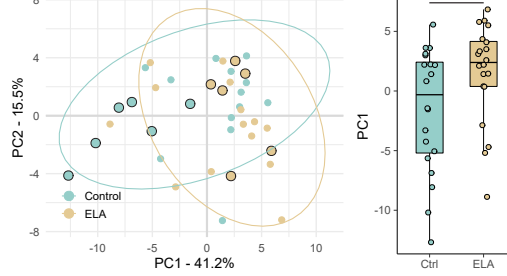

**E**

Juvenile ♂

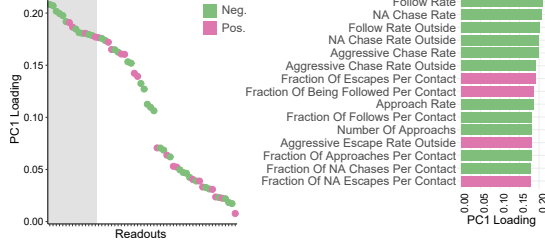

**F**

Adult ♂

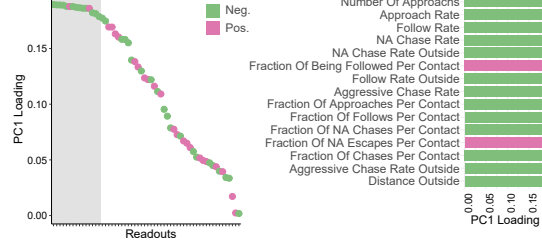

**Supplemental Figure 1: Social Box behavioral characterization of male early life adversity animals.** (A-B) All 58 behavioral readouts collected from male mice over four days in the Social Box through automated location tracking at (A) juvenile and (B) adult stages. Red bars indicate an average decrease and blue bars indicate an average increase in readout values. Statistical differences were calculated between control and early life adversity (ELA) exposed mice. The black line indicates a significance threshold of  $-\text{Log}_{10}$  of 1.3. Hierarchical linear mixed effects models were fit for each rank-normalized and scaled outcome with condition and day as fixed effects and individual mice nested within groups as random effects. (C-D) Principal component analysis (PCA) using all 58 behavioral readouts with the top two PCs (PC1 and PC2) plotted for (C) juvenile and (D) adult animals. The percentages indicate the amount of variance explained for PC1 and PC2. The larger data points indicate the animals that were used for scRNA-seq analysis. The box plots (right) show a significant separation between control and ELA animals in PC1 both in (C) juvenile and (D) adult male mice. Unpaired  $t$  tests, two-tailed. (E-F) The top ranked contributing PC1 loadings, with the dot plot (left) visualizing the distributions of loadings for all 58 behaviors for (E) juvenile and (F) adult animals. The gray box insert indicates the top 15 selected highest loadings which are plotted on the right, with the negative loadings in green and positive loadings in pink. \*  $P < 0.05$ .

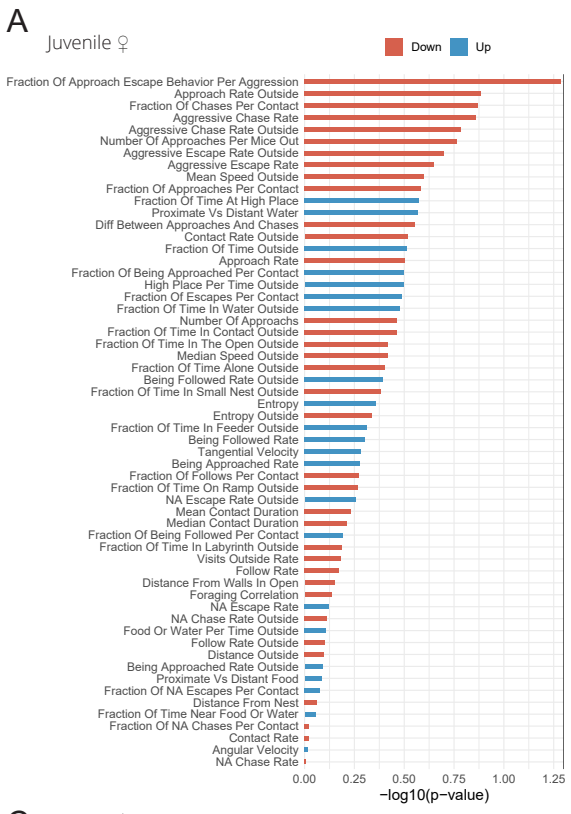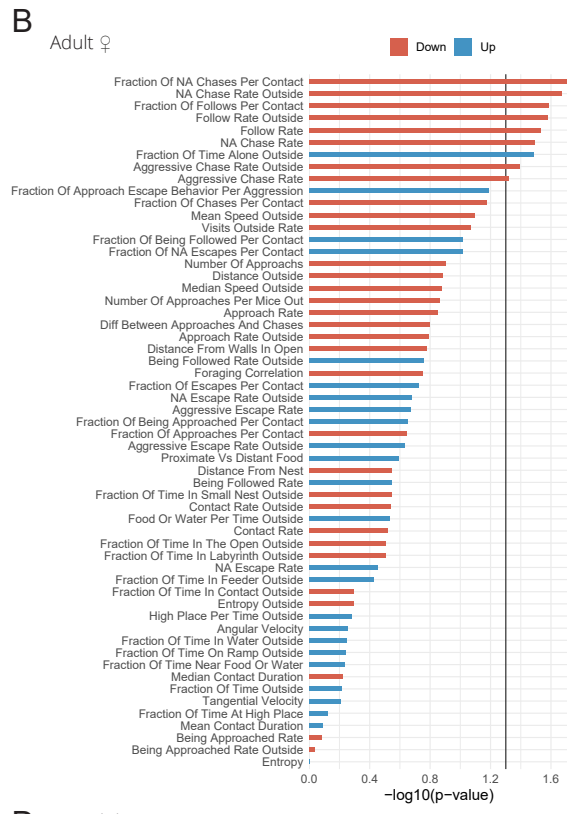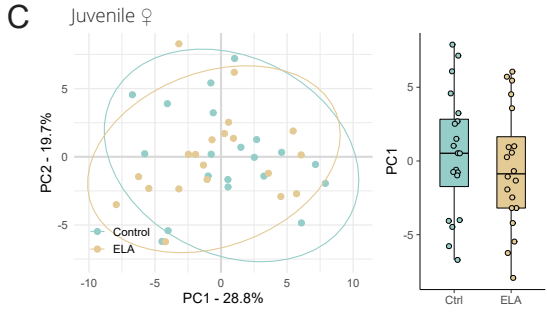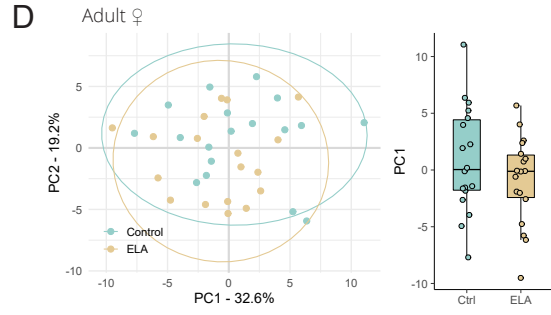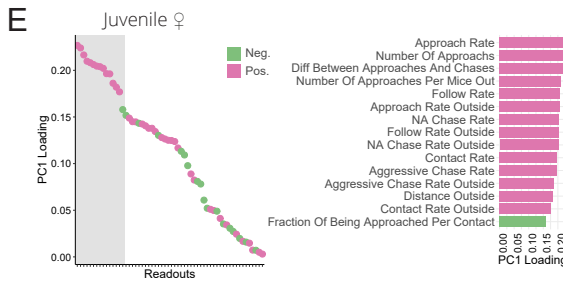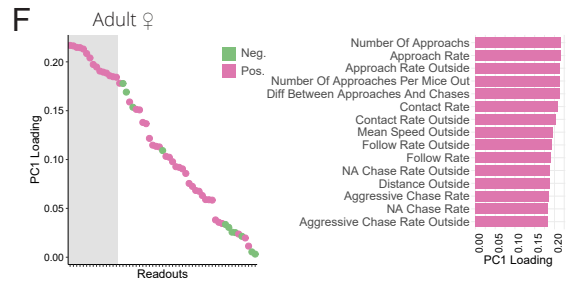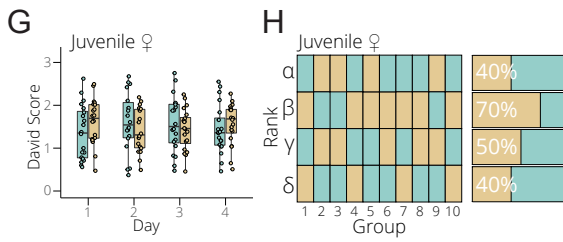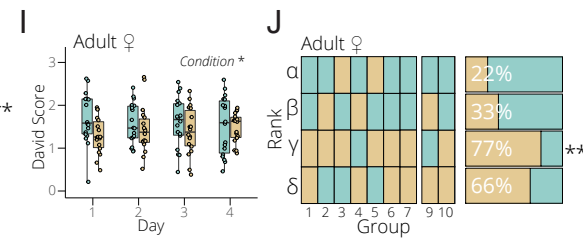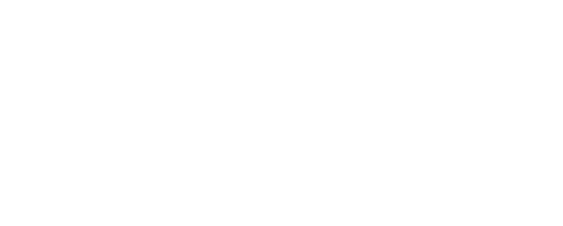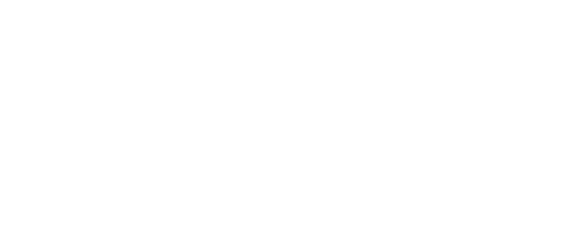

**Supplemental Figure 2: Social Box behavioral characterization of female early life adversity animals.** (A-B) All 58 behavioral readouts collected from female mice over four days in the Social Box through automated location tracking at (A) juvenile and (B) adult stages. Red bars indicate an average decrease and blue bars indicate an average increase in readout values. Statistical differences were calculated between control and early life adversity (ELA) exposed mice. The black line indicates a significance threshold of  $-\text{Log}_{10}$  of 1.3. Hierarchical linear mixed effects models were fit for each rank-normalized and scaled outcome with condition and day as fixed effects and individual mice nested within groups as random effects. (C-D) Principal component analysis (PCA) using all 58 behavioral readouts with the top two PCs (PC1 and PC2) plotted for (C) juvenile and (D) adult animals. The percentages indicate the amount of variance explained for PC1 and PC2. The box plots (right) show no significant separation between control and ELA animals in PC1 for in (C) juvenile and (D) adult female mice. (E-F) The top ranked contributing PC1 loadings, with the dot plot (left) visualizing the distributions of loadings for all 58 behaviors for (E) juvenile and (F) adult animals. The gray box insert indicates the top 15 selected highest loadings which are plotted on the right, with the negative loadings in green and positive loadings in pink. ELA exposed animals have a lower daily calculated David score based on chases at the (G) juvenile and (I) adult stage. Two-way ANOVA repeated measures. (H, J) The hierarchy distribution based on the cumulative David score over four days of all ten groups tested in the SB. The hierarchy order is from alpha, beta, gamma to sigma, with the highest-ranking animal being the alpha. Both at the (H) juvenile and (J) adult stage, only adult female ELA mice display a significantly lower social rank. Group eight was removed due to death of one of the group members. Yates' corrected Chi-square test. \*  $P < 0.05$ , \*\*  $P < 0.01$ .

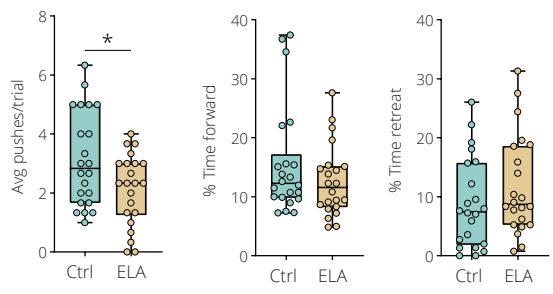

**Supplemental Figure 3: Tube test behaviors of early life adversity animals.** Quantification of **(A)** the average number of pushes, **(B)** percentage of total time moving forward and **(C)** percentage of total time retreating in the tube test. Early life adversity (ELA) exposed animals push significantly less compared to control animals. Box plots represent the 25%, median and 75% quartile, whiskers span minimum to maximum. Unpaired *t* tests, two-tailed. \*  $P < 0.05$ .

A

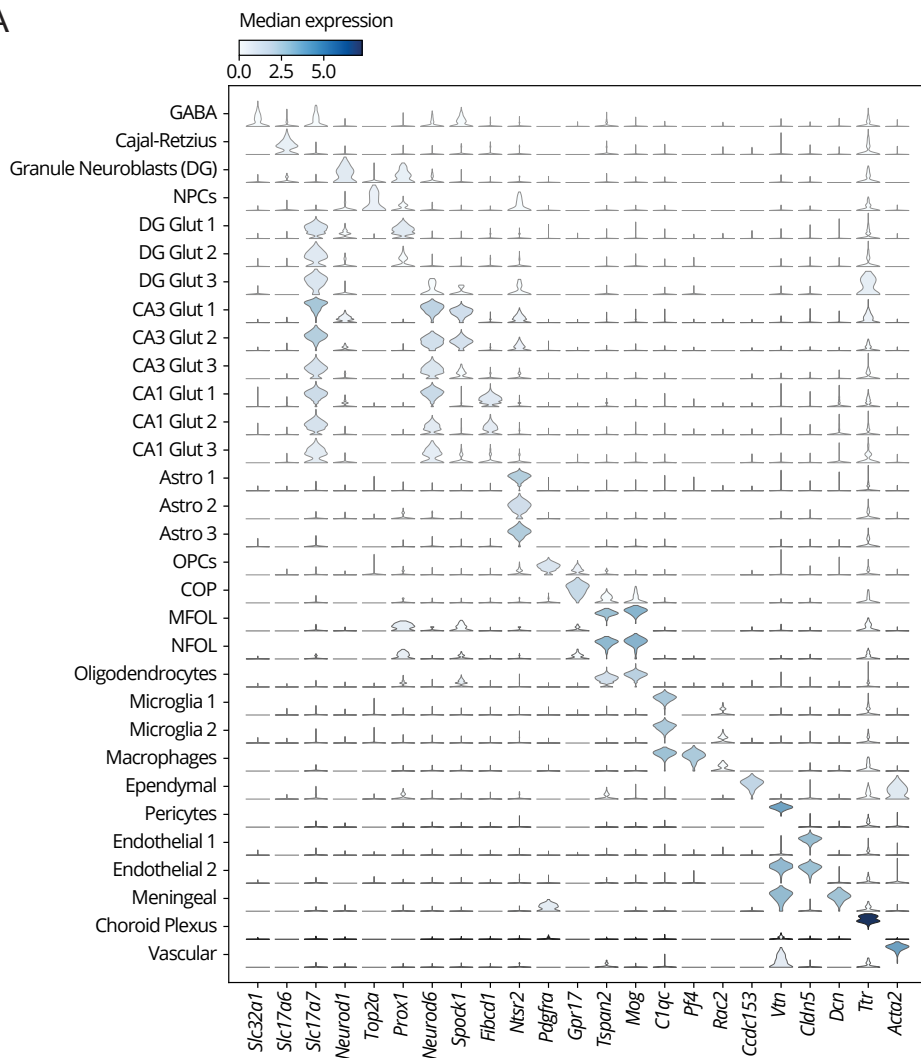

B

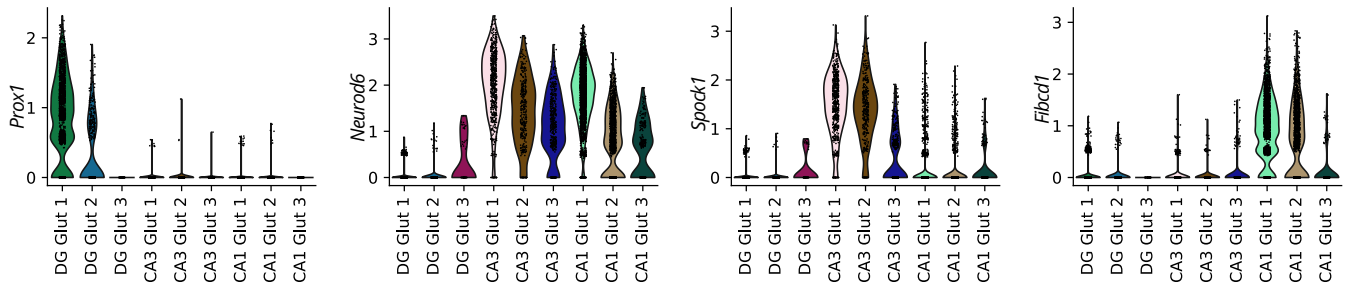

C

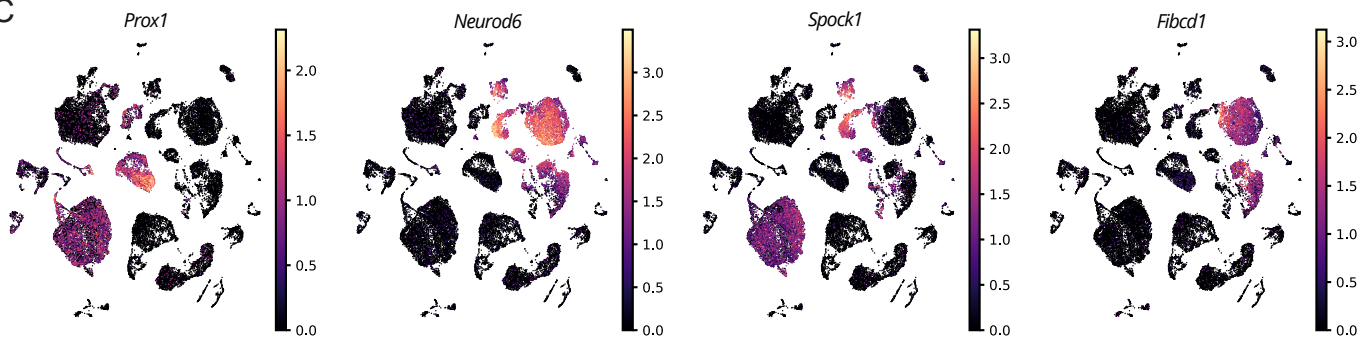



**Supplemental Figure 4: Identity of cell clusters in the ventral hippocampus and marker genes.** (A) Staggered violin plot of expression patterns of cell-type-specific identity markers. (B) Violin plots showing the expression of *Prox1*, *Neurod6*, *Spock1* and *Fibcd1* across the neuronal cell clusters. (C) Uniform Manifold Approximation and Projection (UMAP) plots in which the color gradient indicates the degree of expression of *Prox1*, *Neurod6*, *Spock1* and *Fibcd1* across all cell clusters.

A

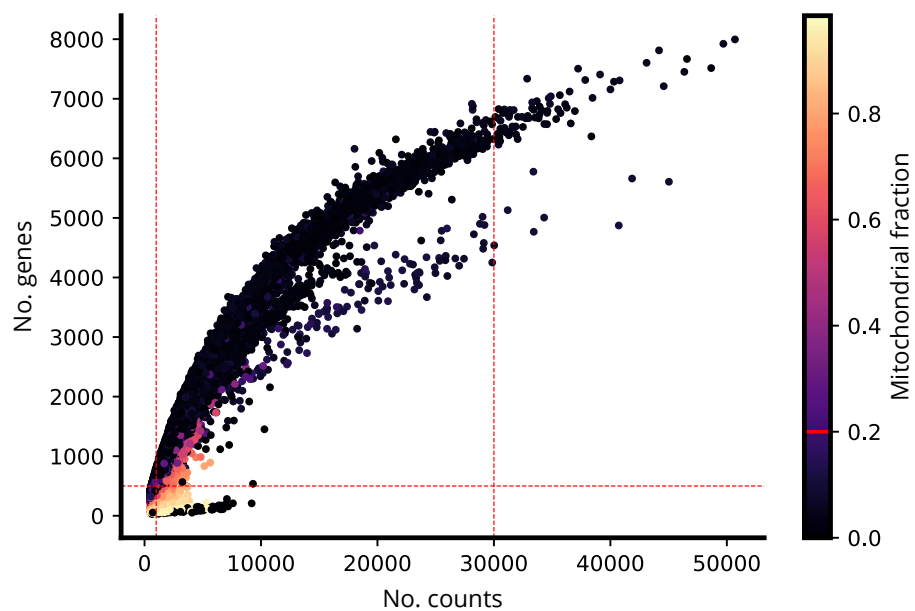

B

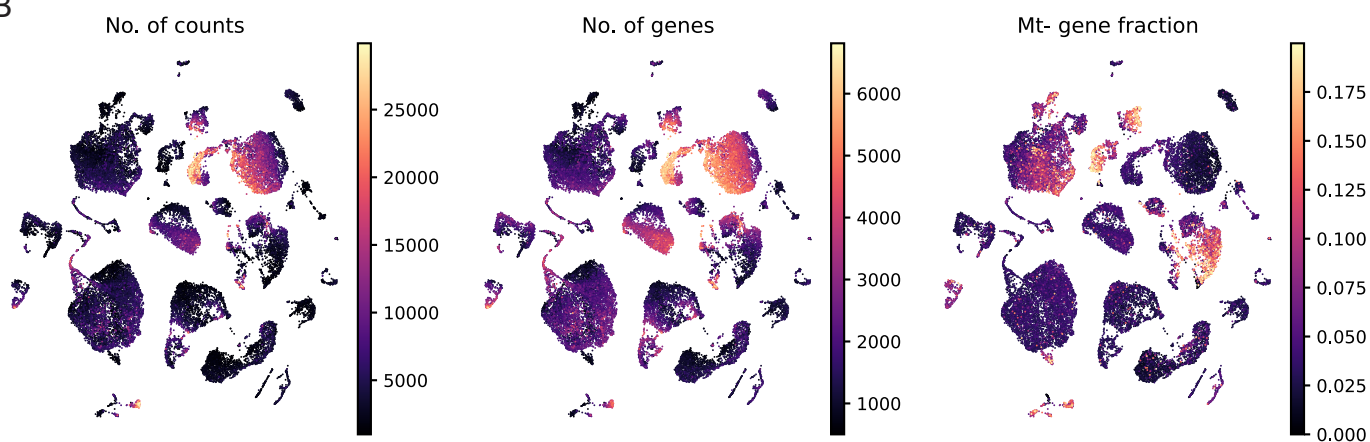

C

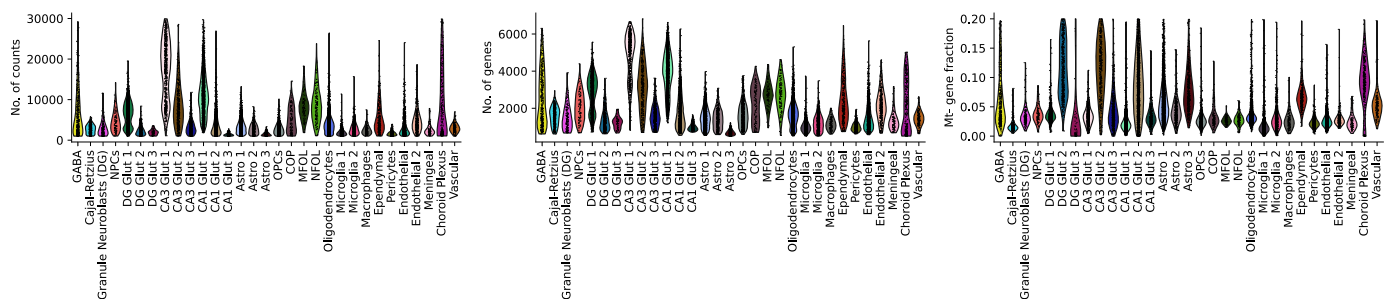

**Supplemental Figure 5: Quality control of scRNA-seq data.** **(A)** Scatterplot of the count depth and number of genes expressed in each cell, color gradient indicates the fraction of counts of mitochondrial genes. The red dashed lines indicate the QC thresholds that were used. Cells with a count depth below a 1000 and above 30000, and less than 500 genes were removed. Furthermore, cells with a mitochondrial fraction above 0.2 were removed. **(B)** UMAP projections of all cell clusters where the color gradient indicates the number of counts, genes, and mitochondrial enrichment respectively. **(C)** Violin plots of the number of counts, genes, and mitochondrial enrichment per identified cell cluster.

A

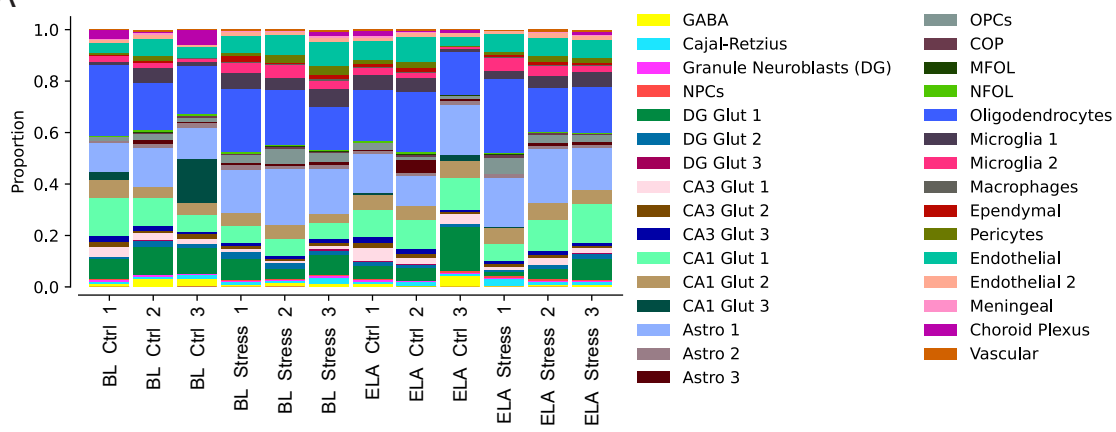

B

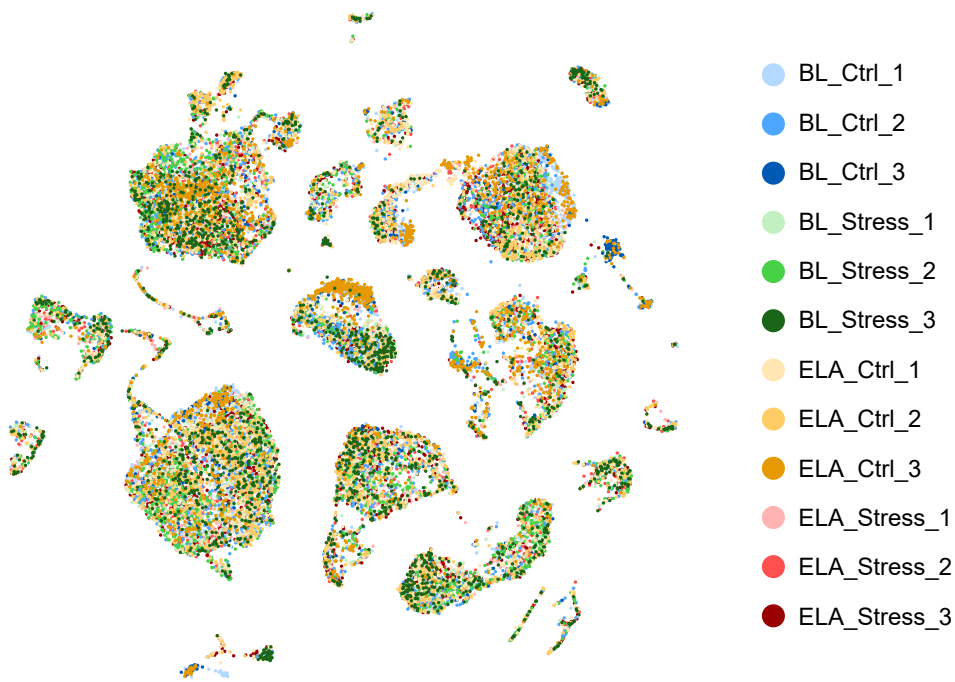

**Supplemental Figure 6: Cell-type proportions and distribution across biological replicates.**

**(A)** Stacked bar plot showing the proportion of each cell type per biological replicate from all four conditions. **(B)** UMAP plot showing the distribution of cells for each biological replicate from all four conditions.

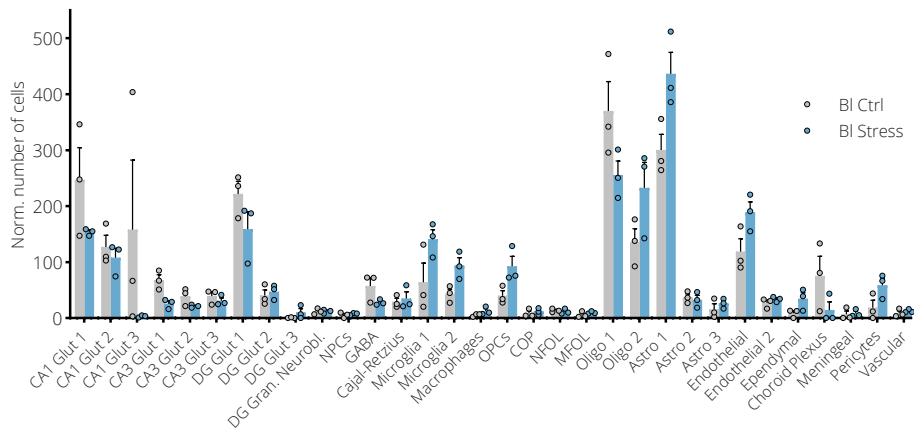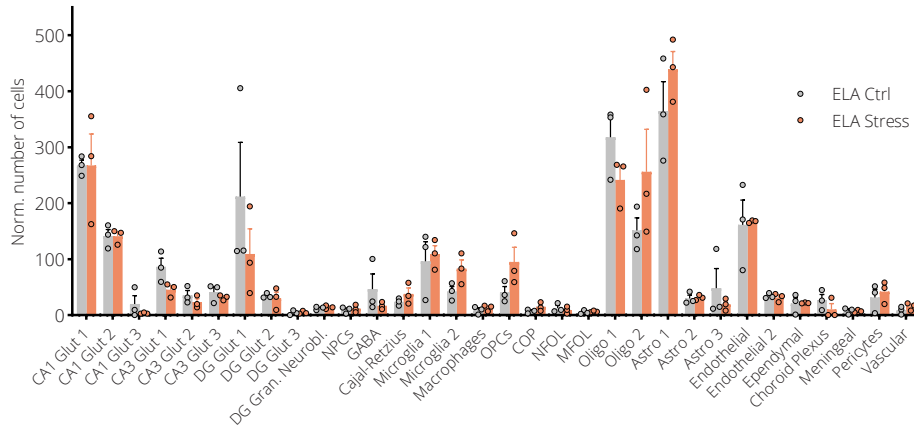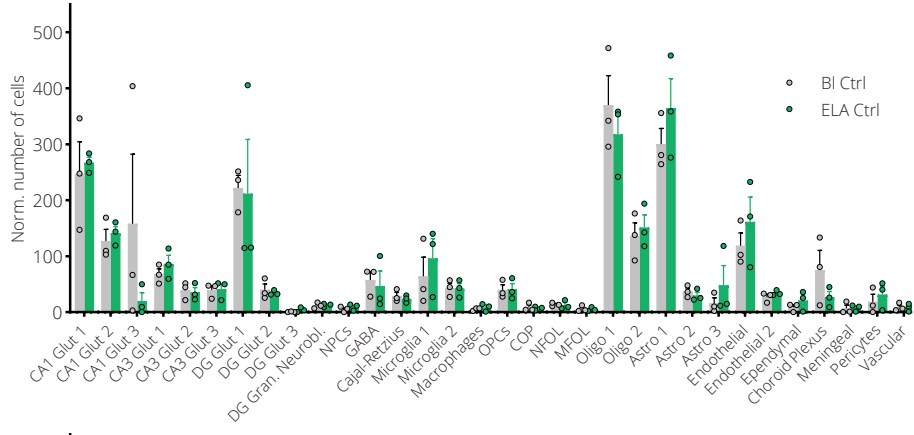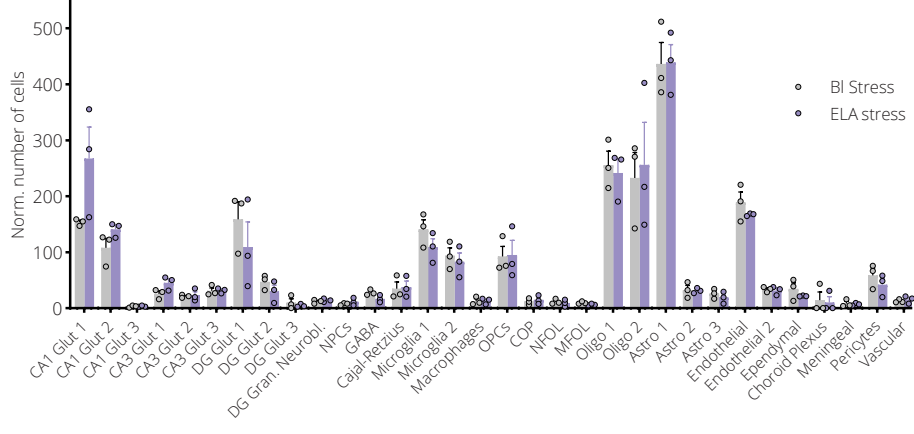

**Supplemental Figure 7: Distribution in cell numbers per cluster between conditions.** No significant differences were identified in the number of cells between cell clusters between the four comparisons **(A)** baseline control (Bl Ctrl), **(B)** baseline stress (Bl Stress), **(C)** early life stress control (ELS Ctrl) and **(D)** ELS stress.





**Supplemental Figure 8: Unique or overlapping differential expressed genes between cell clusters.** UpSet plot showing unique and overlapping genes. The top eight clusters with the highest number of differentially expressed genes (DEGs) are shown. The left bar plot (dark green) indicates the number of DEGs in each cluster. Most DEGs are unique to each cluster indicated with the dark grey dots (below), the dark grey bars on top indicate the number of genes. The dark blue lines intersecting with the dark blue dots in the lower section indicate overlapping gene sets between clusters. The blue bars on top indicate the number of unique overlapping genes for each of the intersections.

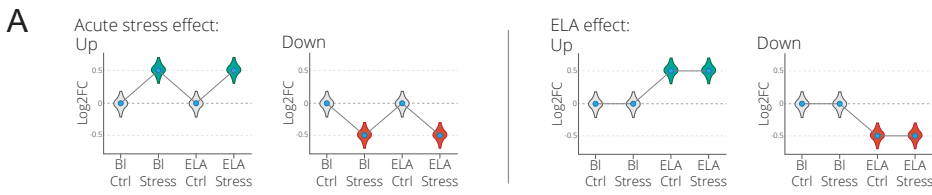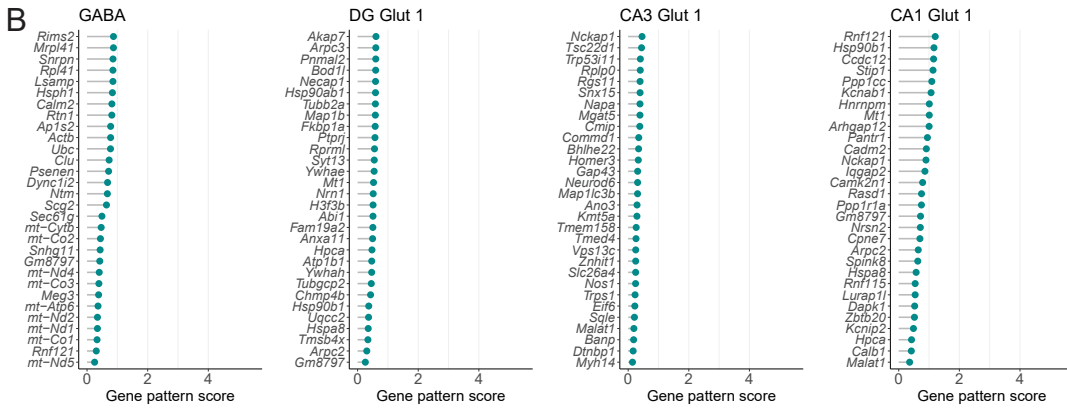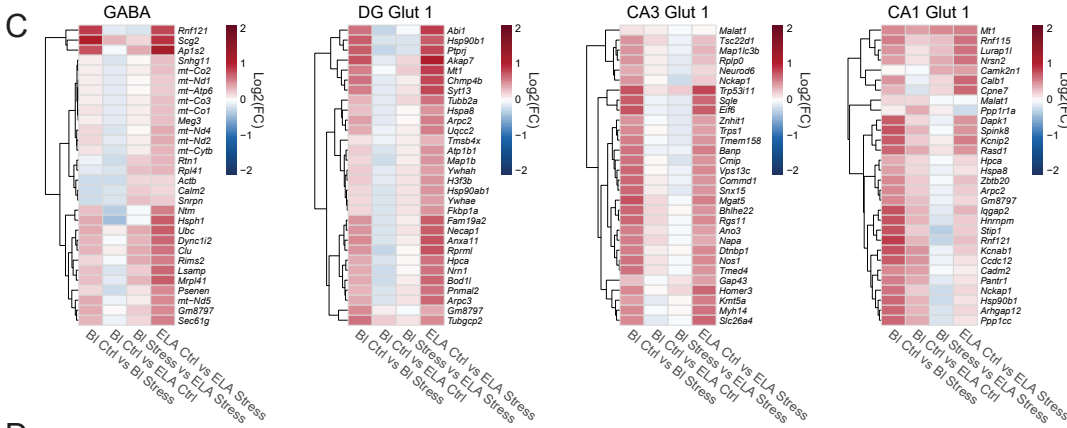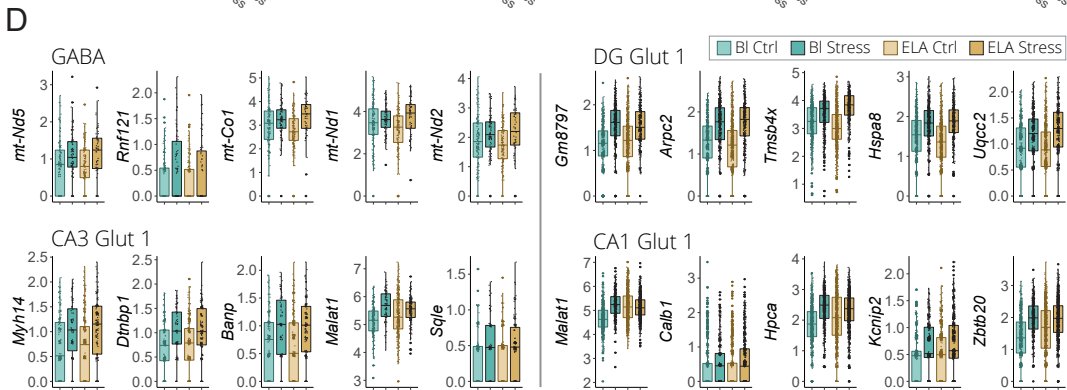

**Supplemental Figure 9: Least transcriptionally patterned differential expressed genes. (A)**

Illustration of the theoretical expression changes induced by acute stress and early life adversity (ELA). With these expression patterns there is no interaction between the two. Genes with a low gene pattern score have a higher likelihood of showing one of the theoretical expression patterns.

**(B)** Top 30 ranked lowest scoring genes in the GABAergic neurons (GABA), dentate gyrus glutamatergic neurons cluster 1 (DG Glut 1), CA3 glutamatergic neurons cluster 1 (CA3 Glut 1) and CA1 glutamatergic neurons cluster 1 (CA1 Glut 1). **(C)** Clustered heatmap visualization of the

Log<sub>2</sub>FC of the top 30 lowest scoring genes in the four selected clusters. The four rows in each

heatmap the four differential expression comparisons. **(D)** Expression patterns quantified by

scRNA-seq of the five lowest patterned genes shows that the lowest scoring genes are primarily acute stress up regulated genes which are unaffected by the ELA background. Box plots represent

the 25%, median and 75% quartile, whiskers span 1.5 x IQR.

**A**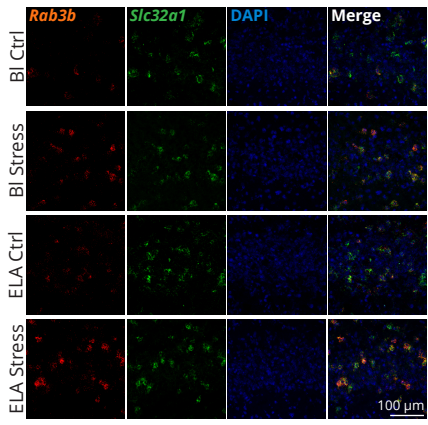**B**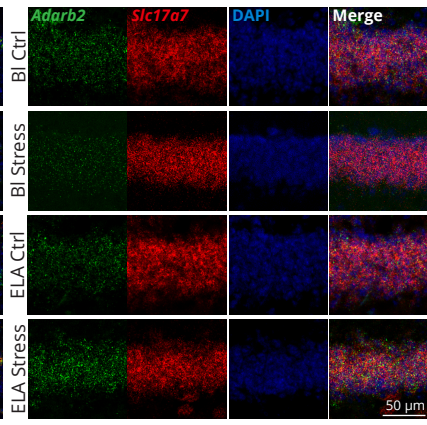**C**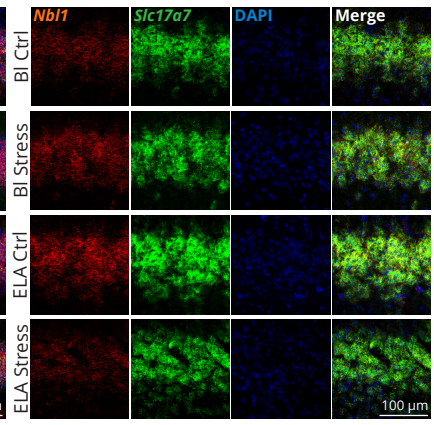

**Supplemental Figure 10. *Rab3b*, *Adarb2* and *Nbl1* differentially respond to acute stress after early life adversity exposure. (A-C)** Representative images of RNAscope fluorescence *in situ* hybridization-stained ventral hippocampus (vHPC) slices collected from the baseline control (BI Ctrl), baseline stress (BI Stress), early life adversity (ELA) control (ELA Ctrl) and ELA stress conditions.

**A****GABA**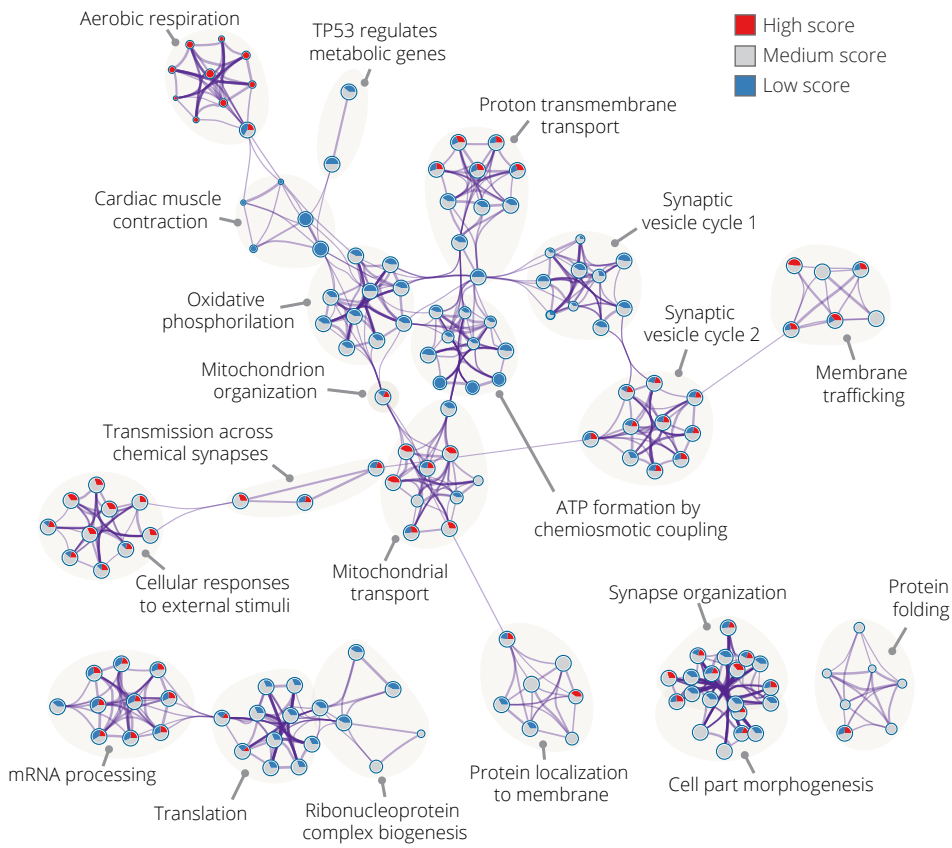**B**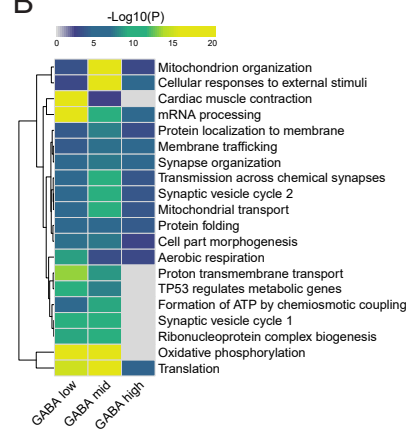

**Supplemental Figure 11: Early life adversity susceptible or resilient differentially expressed gene networks in GABAergic neurons.** (A) Metascape enrichment network visualization of the differentially expressed genes (DEGs) within the GABAergic neuron cluster identifying gene clusters more-or-less susceptible for early life adversity (ELA) induced gene patterning. The color code within each node represents the top 25% highest gene patterning scoring genes (red), 25% lowest scoring genes (blue) and the remaining 50% medium scoring genes (grey). (B) Clustered heatmap visualization of the  $-\text{Log}_{10}$  p-value associated with each low, medium and high scoring gene pathway.

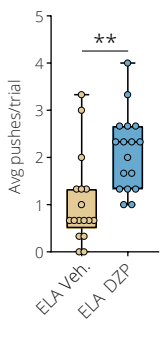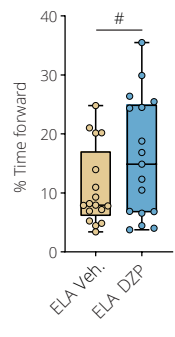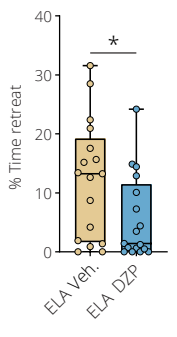



**Supplemental Figure 12: Tube test behaviors of diazepam treated early life adversity animals.** Quantification of the average number of pushes, percentage of total time moving forward and percentage of total time retreating in the tube test. Early life adversity (ELA) exposed animals chronically treated with diazepam (DZP) **(A)** push significantly more, **(B)** spend less time moving forward and **(C)** retreat less compared to saline (Sal.) injected ELA animals. Box plots represent the 25%, median and 75% quartile, whiskers span minimum to maximum. Unpaired *t* tests, two-tailed. #  $P < 0.1$ , \*  $P < 0.05$ , \*\*  $P < 0.01$ .

| Condition comparison | Cluster       | Gene          | qval        | Log2fc      | Mean expression condition 1 | Mean expression condition 2 |
|----------------------|---------------|---------------|-------------|-------------|-----------------------------|-----------------------------|
| Bl Ctrl Bl Stress    | GABA          | <i>Rab3b</i>  | 0.961329062 | -0.09928088 | 0.329000295                 | 0.315773255                 |
| Bl Ctrl ELA Ctrl     | GABA          | <i>Rab3b</i>  | 0.198631654 | -0.43176524 | 0.329000295                 | 0.237828506                 |
| Bl Stress ELA Stress | GABA          | <i>Rab3b</i>  | 0.013448836 | 1.06230425  | 0.315773255                 | 0.716044298                 |
| ELA Ctrl ELA Stress  | GABA          | <i>Rab3b</i>  | 1.04253E-05 | 1.396774697 | 0.237828506                 | 0.716044298                 |
| Bl Ctrl Bl Stress    | DG Glut 1     | <i>Adarb2</i> | 2.01196E-11 | -0.59244313 | 0.464311451                 | 0.296669075                 |
| Bl Ctrl Bl Stress    | DG Glut 2     | <i>Adarb2</i> | 0.755600275 | -0.46406836 | 0.414567779                 | 0.254720346                 |
| Bl Ctrl ELA Ctrl     | DG Glut 1     | <i>Adarb2</i> | 0.000520172 | -0.35336791 | 0.464311451                 | 0.309501342                 |
| Bl Ctrl ELA Ctrl     | DG Glut 2     | <i>Adarb2</i> | 0.92554625  | 0.143991672 | 0.414567779                 | 0.421222124                 |
| Bl Stress ELA Stress | DG Glut 1     | <i>Adarb2</i> | 1.00E-16    | 1.094626153 | 0.296669075                 | 0.714702507                 |
| Bl Stress ELA Stress | DG Glut 2     | <i>Adarb2</i> | 0.013611405 | 0.827408617 | 0.254720346                 | 0.565356487                 |
| ELA Ctrl ELA Stress  | DG Glut 1     | <i>Adarb2</i> | 1.00E-16    | 0.862763853 | 0.309501342                 | 0.714702507                 |
| ELA Ctrl ELA Stress  | DG Glut 2     | <i>Adarb2</i> | 0.762748614 | 0.219604158 | 0.421222124                 | 0.565356487                 |
| Bl Ctrl Bl Stress    | NPCs          | <i>Nbl1</i>   | 0.394199516 | 0.791705092 | 0.389057364                 | 0.715483177                 |
| Bl Ctrl Bl Stress    | CA3 Glut 1    | <i>Nbl1</i>   | 1.00E-16    | 0.967374641 | 0.6749151                   | 1.317506979                 |
| Bl Ctrl Bl Stress    | CA3 Glut 2    | <i>Nbl1</i>   | 0.006388961 | 0.803418092 | 0.361598856                 | 0.72580065                  |
| Bl Ctrl Bl Stress    | CA3 Glut 3    | <i>Nbl1</i>   | 0.014754223 | 0.933468524 | 0.206134232                 | 0.469054445                 |
| Bl Ctrl Bl Stress    | CA1 Glut 1    | <i>Nbl1</i>   | 1.00E-16    | 0.983139202 | 0.254165402                 | 0.615394128                 |
| Bl Ctrl Bl Stress    | Pericytes     | <i>Nbl1</i>   | 0.838437814 | -0.18608254 | 1.403872086                 | 1.226873885                 |
| Bl Ctrl Bl Stress    | Endothelial 2 | <i>Nbl1</i>   | 0.759321579 | 0.122255658 | 0.926700766                 | 1.087642454                 |
| Bl Ctrl Bl Stress    | Vascular      | <i>Nbl1</i>   | 0.933591124 | -0.15396678 | 0.793638067                 | 0.762037313                 |
| Bl Ctrl ELA Ctrl     | NPCs          | <i>Nbl1</i>   | 0.972646739 | -0.09616122 | 0.389057364                 | 0.39914922                  |
| Bl Ctrl ELA Ctrl     | CA3 Glut 1    | <i>Nbl1</i>   | 1.00E-16    | 0.776730683 | 0.6749151                   | 1.092528095                 |
| Bl Ctrl ELA Ctrl     | CA3 Glut 2    | <i>Nbl1</i>   | 3.08733E-05 | 0.952259865 | 0.361598856                 | 0.778015737                 |
| Bl Ctrl ELA Ctrl     | CA3 Glut 3    | <i>Nbl1</i>   | 4.47922E-11 | 1.463265272 | 0.206134232                 | 0.734353096                 |
| Bl Ctrl ELA Ctrl     | CA1 Glut 1    | <i>Nbl1</i>   | 1.00E-16    | 1.094316306 | 0.254165402                 | 0.619767306                 |
| Bl Ctrl ELA Ctrl     | Pericytes     | <i>Nbl1</i>   | 0.901086896 | -0.30447157 | 1.403872086                 | 1.139461906                 |
| Bl Ctrl ELA Ctrl     | Endothelial 2 | <i>Nbl1</i>   | 0.952999207 | 0.074124773 | 0.926700766                 | 0.912775269                 |
| Bl Ctrl ELA Ctrl     | Vascular      | <i>Nbl1</i>   | 0.895257603 | -0.22261114 | 0.793638067                 | 0.678607903                 |
| Bl Stress ELA Stress | NPCs          | <i>Nbl1</i>   | 0.319827467 | -0.81921787 | 0.715483177                 | 0.392016392                 |
| Bl Stress ELA Stress | CA3 Glut 1    | <i>Nbl1</i>   | 1.00E-16    | -0.86316894 | 1.317506979                 | 0.699924851                 |
| Bl Stress ELA Stress | CA3 Glut 2    | <i>Nbl1</i>   | 0.008471502 | -0.96803819 | 0.72580065                  | 0.321384128                 |
| Bl Stress ELA Stress | CA3 Glut 3    | <i>Nbl1</i>   | 0.288385557 | -0.66750212 | 0.469054445                 | 0.25781934                  |
| Bl Stress ELA Stress | CA1 Glut 1    | <i>Nbl1</i>   | 1.00E-16    | -0.77894523 | 0.615394128                 | 0.301681546                 |
| Bl Stress ELA Stress | Pericytes     | <i>Nbl1</i>   | 0.705578511 | -0.12347337 | 1.226873885                 | 1.173891677                 |
| Bl Stress ELA Stress | Endothelial 2 | <i>Nbl1</i>   | 0.272766651 | -0.25400922 | 1.087642454                 | 0.86982364                  |
| Bl Stress ELA Stress | Vascular      | <i>Nbl1</i>   | 0.952829862 | 0.112288959 | 0.762037313                 | 0.8692493                   |
| ELA Ctrl ELA Stress  | NPCs          | <i>Nbl1</i>   | 0.953373913 | 0.064056279 | 0.39914922                  | 0.392016392                 |
| ELA Ctrl ELA Stress  | CA3 Glut 1    | <i>Nbl1</i>   | 2.00958E-10 | -0.66886375 | 1.092528095                 | 0.699924851                 |
| ELA Ctrl ELA Stress  | CA3 Glut 2    | <i>Nbl1</i>   | 1.10006E-05 | -1.1160067  | 0.778015737                 | 0.321384128                 |
| ELA Ctrl ELA Stress  | CA3 Glut 3    | <i>Nbl1</i>   | 2.13954E-08 | -1.20071285 | 0.734353096                 | 0.25781934                  |
| ELA Ctrl ELA Stress  | CA1 Glut 1    | <i>Nbl1</i>   | 1.00E-16    | -0.88646449 | 0.619767306                 | 0.301681546                 |
| ELA Ctrl ELA Stress  | Pericytes     | <i>Nbl1</i>   | 0.986007376 | -0.00567837 | 1.139461906                 | 1.173891677                 |
| ELA Ctrl ELA Stress  | Endothelial 2 | <i>Nbl1</i>   | 0.552922749 | -0.20803137 | 0.912775269                 | 0.86982364                  |
| ELA Ctrl ELA Stress  | Vascular      | <i>Nbl1</i>   | 0.934634449 | 0.174396084 | 0.678607903                 | 0.8692493                   |

**Supplemental Table 1: Expression of genes selected for RNAscope validation.** Mean expression values of *Rab3b*, *Adarb2* and *Nbl1* determined by scRNA-seq.
